# Supplementary material for: A phthalocyanine sensor array based on sensitivity and current changes for highly sensitive identification of three toxic gases at ppb levels
Source: Royal Society of Chemistry journal article supplement (doi:10.1039/d0nj02025g), 2020-01-01
Supplement: d0nj02025g1.pdf [file d0nj02025g1.pdf]

**Phthalocyanine sensor array based on sensitivity and current changes  
for highly sensitive identification of three toxic gases in ppb levels**

**Xueqian Duan,<sup>[a]</sup> Yingze Zhang,<sup>[a]</sup> Haoyuan Wang,<sup>[a]</sup> Fangna Dai,<sup>[a]</sup> Guangwu Yang,<sup>[a]</sup>  
Yanli Chen\*<sup>[a]</sup>**

[a] School of Materials Science and Engineering, China University of Petroleum (East China),  
Qingdao 266580, China.

E-mail: [yanlichen@upc.edu.cn](mailto:yanlichen@upc.edu.cn)

## Supplementary information:

*Contents:*

### Experimental Section

**Fig.S1.** Experimental isotopic pattern for the molecular ion of compounds **1-4**(a-d) shown in the MALDI-TOF mass spectrum.

**Fig.S2.** <sup>1</sup>HNMR of H<sub>2</sub>Pc[β-O(4-CF<sub>3</sub>-Ph)<sub>4</sub>] (**2**) and H<sub>2</sub>Pc[α-O(4-CF<sub>3</sub>-Ph)<sub>4</sub>] (**4**)

**Fig.S3.** Differential pulse voltammetry (DPV) of **1-4**(a-d) in DMF containing 0.1 mol L<sup>-1</sup> [Bu<sub>4</sub>N][ClO<sub>4</sub>] vs SCE.

**Fig.S4.** The molecular dimension of compounds **1-4**(a-d) obtained using Materials studio for windows Version 8.0.

**Fig.S5.** Reproducibility test for the sensors of **1-4** to NO<sub>2</sub>, NH<sub>3</sub> and H<sub>2</sub>S. (exposure time: 1 or 2 min)

**Table S1.** Half-wave redox potentials of **1-4** (V vs SCE) in DMF containing 0.1 mol L<sup>-1</sup> [Bu<sub>4</sub>N][ClO<sub>4</sub>] together with the HOMO and LUMO.

**Table S2.** NO<sub>2</sub> detection properties for films of some representative phthalocyanine-based compounds at the room temperature.

**Table S3.** NH<sub>3</sub> detection properties for films of some representative phthalocyanine-based compounds at the room temperature.

**Table S4.** H<sub>2</sub>S detection properties for films of some representative phthalocyanine-based compounds at the room temperature.

## Experimental section

### 1.1 Materials

All of reagents were purchased from Aldrich and were not further processed during use unless otherwise noted. Solvent removal of water follows the general method. Column chromatography was carried out on silica gel (300–400 mesh) with the indicated eluents. Target compounds **1-4** were prepared according to the similar method in the literature<sup>1</sup>.

### 1.2 Measurements and characterizations

UV-vis absorption spectra were recorded on a Hitachi U-3900 spectrophotometer. MALDI-TOF mass spectrum was collected by a Bruker BIFLEX III ultra-high-resolution. Electrochemical measurement was tested with a BAS CV-50W voltammetric analyzer. The electrolysis cell is a three-electrode system including three inlets for the glassy carbon disk (working electrode, 3.0 mm in diameter), the Pt (counter electrode), and the reference electrode was Ag/Ag<sup>+</sup> (0.01 M AgNO<sub>3</sub> in chromatographically pure acetonitrile solution), which was combined to the solution by a Luggin capillary, whose tip was set close up to the glassy carbon electrode. It was corrected for junction potentials by being referenced internally to the ferrocenium/ferrocene (Fc<sup>+</sup>/Fc) couple. Typically, a 0.1 mol L<sup>-1</sup> solution of [Bu<sub>4</sub>N][ClO<sub>4</sub>] in DMF containing 0.5 mmol L<sup>-1</sup> of sample was purged with nitrogen for 10 min, then the voltammogram was recorded at room temperature. X-ray diffraction (XRD) experiments were carried out on a Bruker D8 FOCUS X-ray diffractometer with copper (K $\alpha$ ) radiation ( $\lambda = 1.5406$  Å). Scanning electron microscope (SEM) images were collected under ambient conditions using the tapping mode with a NanoscopeIII/Bioscope scanning probe microscope from digital instruments. The fundamental electrical and sensor measurements were performed by using a Keysight B2910A precision source/measure unit with an incorporated direct current voltage

supply. The electrometer was controlled by Quick IV Measurement Software. Current–voltage (I–V) curves were registered in the voltage range of  $-10 \sim +10$  V. For gas sensing experiments, the samples were constantly polarized at  $+10$  V. Repeating all experiments to ensure repeatable results. Conductivity,  $\sigma$ , can be calculated by following equation based on Current–voltage (I–V) curves,  $\sigma = dI / ((2n-1)LhV)$ , where  $d$  is the interelectrode spacing,  $I$  the current,  $n$  the number of electrode digits,  $L$  the overlapping length of the electrodes, and  $h$  the electrode thickness as the film thickness exceeds that of the ITO electrodes in present case,  $V$  is the voltage. Sensing experiments were carried out in a cuboid Teflon sensor chamber of 11.5 (length) x 2.5 (width) x 1.5 (height)  $\text{cm}^3$ . The desired  $\text{NO}_2$ ,  $\text{NH}_3$  or  $\text{H}_2\text{S}$  concentration was produced by diluting a mixture of  $\text{NO}_2/\text{N}_2$  (20 ppm  $\text{NO}_2$ , from Qingdao Ludong Gas Co., Ltd, China),  $\text{NH}_3/\text{N}_2$  (500 ppm  $\text{NH}_3$ , from Qingdao Ludong Gas Co., Ltd, China) or  $\text{H}_2\text{S}/\text{N}_2$  (50 ppm  $\text{H}_2\text{S}$ , from Qingdao Ludong Gas Co., Ltd, China) with dry  $\text{N}_2$  using two CS200 Mass Flow Controllers (total mass flow:  $0.1 \text{ L} \cdot \text{min}^{-1}$  for  $\text{NO}_2$ ,  $\text{NH}_3$  or  $\text{H}_2\text{S}$  and  $2 \text{ L} \cdot \text{min}^{-1}$  for diluent gas  $\text{N}_2$ , unless otherwise stated, nitrogen is dry gas), respectively. In the present case, dry  $\text{N}_2$  (purity: 99.99%) gas was selected as the carrier gas during all the sensing measurements.

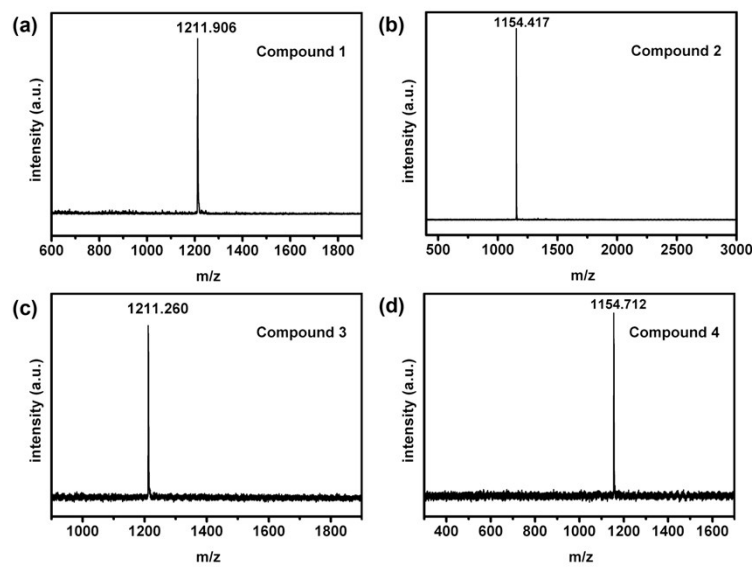

**Fig.S1.** MALDI-TOF mass spectrum of CoPc[ $\beta$ -O(4-CF<sub>3</sub>-Ph)<sub>4</sub>] (a), H<sub>2</sub>Pc[ $\beta$ -O(4-CF<sub>3</sub>-Ph)<sub>4</sub>] (b), CoPc[ $\alpha$ -O(4-CF<sub>3</sub>-Ph)<sub>4</sub>] (c) and H<sub>2</sub>Pc[ $\alpha$ -O(4-CF<sub>3</sub>-Ph)<sub>4</sub>] (d).

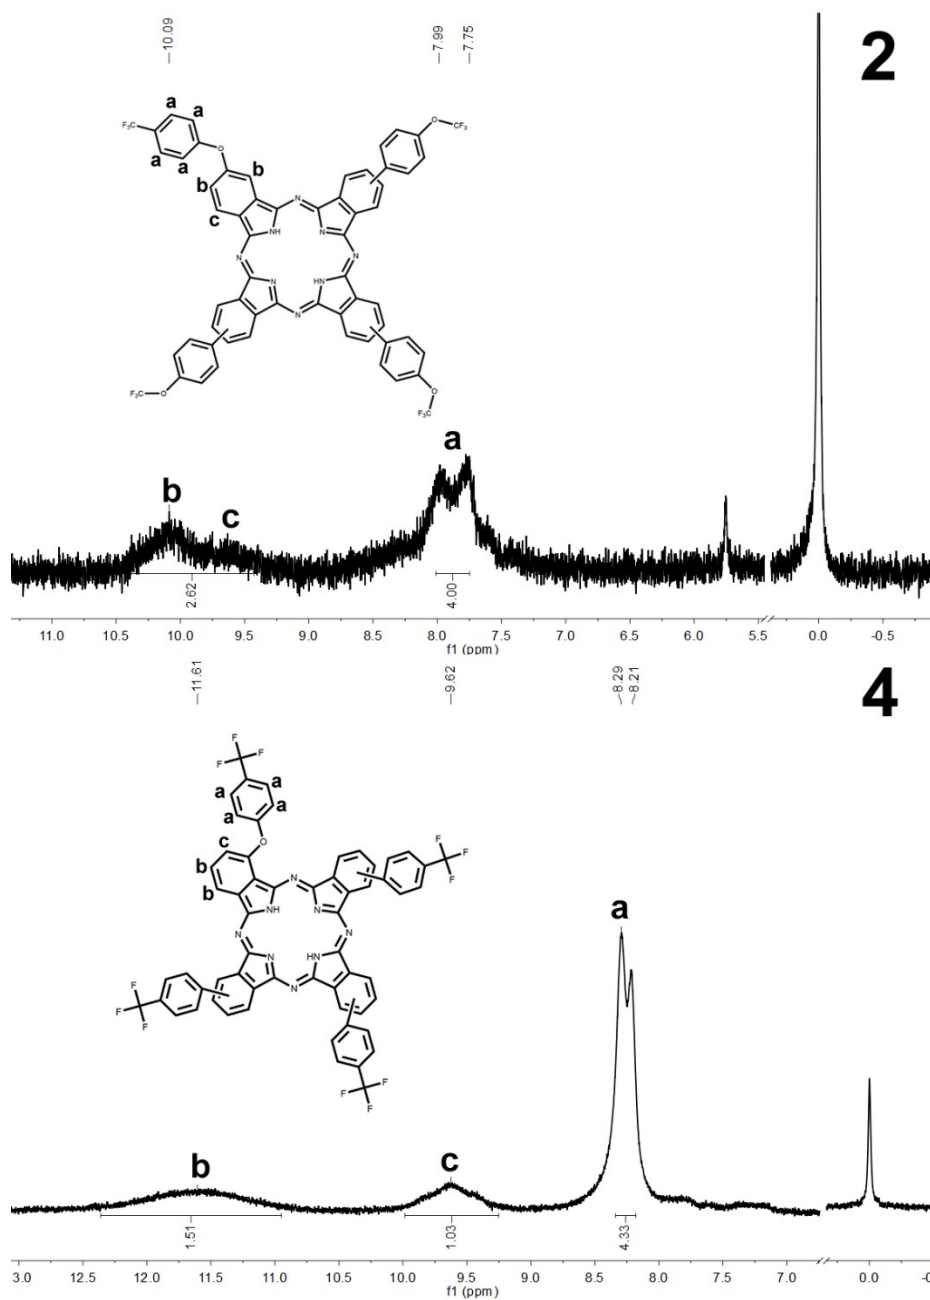

2: <sup>1</sup>H NMR (400 MHz, (CD<sub>3</sub>)<sub>2</sub>SO): δ 7.99, 7.75 (d, 16H, a), 9.65, 10.09 (br, 12H, b, c)

4: <sup>1</sup>H NMR (400 MHz, (CD<sub>3</sub>)<sub>2</sub>SO): δ 8.29, 8.21 (d, 16H, a), 9.62 (br, 4H, c), 11.61 (br, 8H, b)

**Fig.S2.** <sup>1</sup>HNMR of H<sub>2</sub>Pc[β-O(4-CF<sub>3</sub>-Ph)<sub>4</sub>] (**2**) and H<sub>2</sub>Pc[α-O(4-CF<sub>3</sub>-Ph)<sub>4</sub>] (**4**)

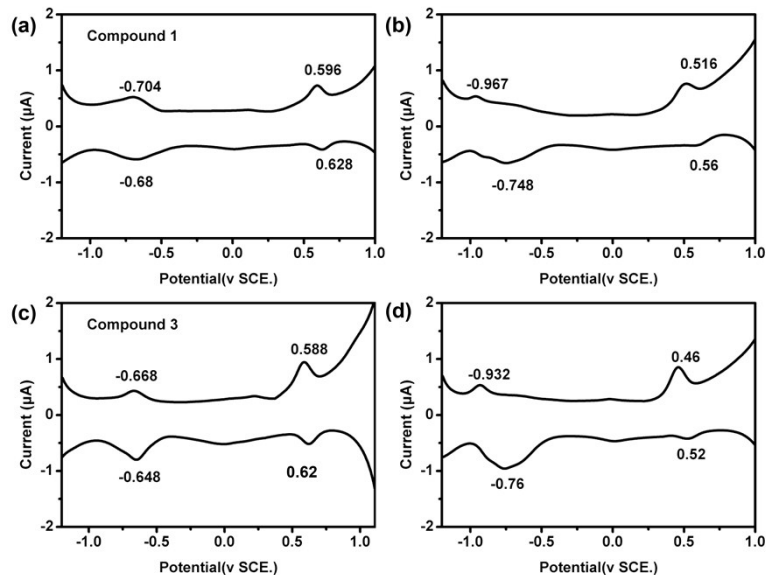

**Fig.S3.** Differential pulse voltammetry (DPV) of CoPc[ $\beta$ -O(4-CF<sub>3</sub>-Ph)<sub>4</sub>] (a), H<sub>2</sub>Pc[ $\beta$ -O(4-CF<sub>3</sub>-Ph)<sub>4</sub>] (b), CoPc[ $\alpha$ -O(4-CF<sub>3</sub>-Ph)<sub>4</sub>] (c) and H<sub>2</sub>Pc[ $\alpha$ -O(4-CF<sub>3</sub>-Ph)<sub>4</sub>] (d) in DMF containing 0.1 mol L<sup>-1</sup> [Bu<sub>4</sub>N][ClO<sub>4</sub>] vs SCE.

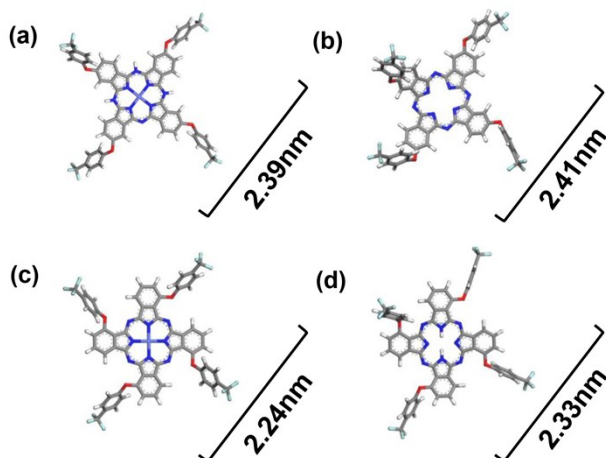

**Fig.S4.** The molecular dimension with a typical  $D_{4h}$  symmetry of CoPc[ $\beta$ -O(4-CF<sub>3</sub>-Ph)<sub>4</sub>] (a) : 2.39 nm; H<sub>2</sub>Pc[ $\beta$ -O(4-CF<sub>3</sub>-Ph)<sub>4</sub>] (b) : 2.41 nm; CoPc[ $\alpha$ -O(4-CF<sub>3</sub>-Ph)<sub>4</sub>] (c):2.24 nm; H<sub>2</sub>Pc[ $\alpha$ -O(4-CF<sub>3</sub>-Ph)<sub>4</sub>] (d) : 2.33 nm. (In fact, each of four compounds should contain four isomers with  $D_{4h}$ ,  $D_{2h}$ ,  $C_{2v}$  and  $C_s$  symmetry).

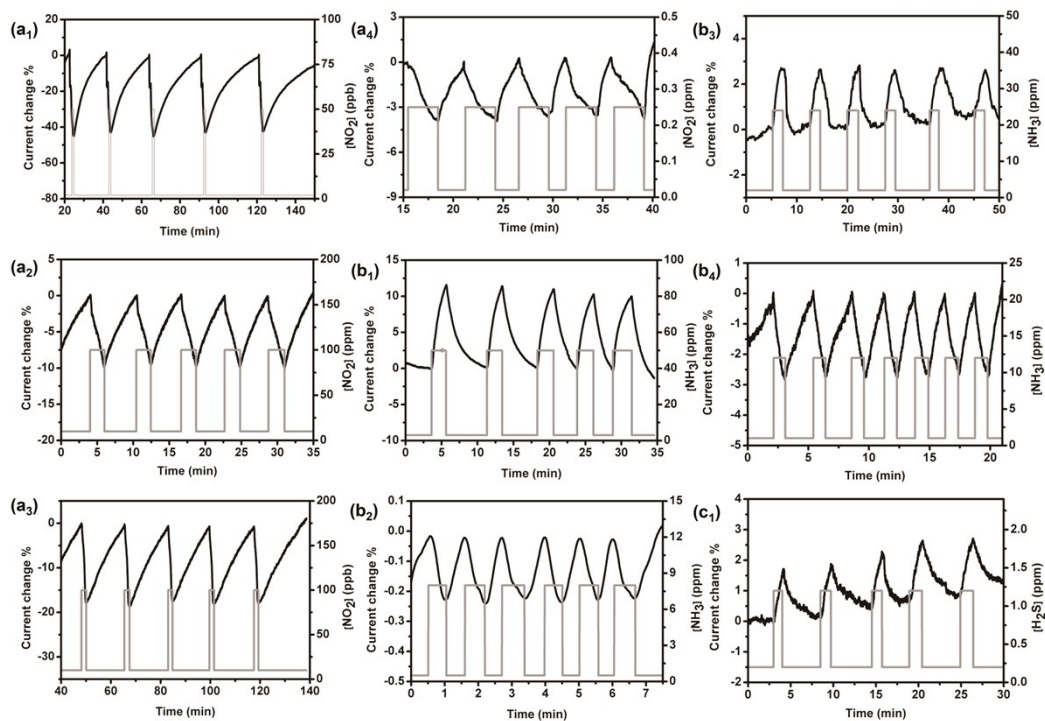

**Fig.S5.** Reproducibility test to NO<sub>2</sub>, NH<sub>3</sub>, H<sub>2</sub>S for the devices of 1-4. a<sub>1</sub>-a<sub>4</sub>) Response of 1-4 to 0.04 ppm, 1.1 ppm, 1.0 ppm, 0.5ppm NO<sub>2</sub>, respectively; b<sub>1</sub>-b<sub>4</sub>) Response of 1-4 to 96 ppm, 1.6 ppm, 48 ppm, 18 ppm NH<sub>3</sub>, respectively; c<sub>1</sub>) Response of 1 to 1.6 ppm H<sub>2</sub>S.



**Table S1.** Half-wave redox potentials of **1-4** (V vs SCE) in DMF containing 0.1 mol L<sup>-1</sup> [Bu<sub>4</sub>N][ClO<sub>4</sub>] together with the HOMO and LUMO.

| Compound | Oxd <sub>1</sub> /V | Red <sub>1</sub> /V | E <sub>HOMO</sub> <sup>a</sup> /eV | E <sub>LUMO</sub> <sup>a</sup> /eV | ΔE <sub>1/2</sub> <sup>b</sup> /V |
|----------|---------------------|---------------------|------------------------------------|------------------------------------|-----------------------------------|
| <b>1</b> | 0.61                | -0.69               | -5.48                              | -4.17                              | 1.31                              |
| <b>2</b> | 0.54                | -0.86               | -5.40                              | -4.01                              | 1.39                              |
| <b>3</b> | 0.60                | -0.66               | -5.47                              | -4.21                              | 1.26                              |
| <b>4</b> | 0.49                | -0.85               | -5.36                              | -4.02                              | 1.34                              |

<sup>a</sup> Calculated from empirical formula of HOMO = -(Oxd<sub>1</sub> + 4.44 eV); LUMO = -(Red<sub>1</sub> + 4.44eV).

<sup>b</sup> ΔE<sub>1/2</sub> = Oxd<sub>1</sub>-Red<sub>1</sub>, i.e. the HOMO LUMO gap of corresponding molecule.

**Table S2.** NO<sub>2</sub> detection properties for films of some representative phthalocyanine-based compounds at the room temperature.

| Compounds                                                                                                                                                                                                                                                                     | p/n-type (NO <sub>2</sub> ) | LOD (ppm) | Method             | Sensitivity (%ppm <sup>-1</sup> ) | Range (ppm) | Ref. |
|-------------------------------------------------------------------------------------------------------------------------------------------------------------------------------------------------------------------------------------------------------------------------------|-----------------------------|-----------|--------------------|-----------------------------------|-------------|------|
| CoPc[β-O(4-CF <sub>3</sub> -Ph) <sub>4</sub> ] (1)                                                                                                                                                                                                                            | n                           | 0.003     | SA <sup>[a]</sup>  | 616                               | 0.02-0.1    | -    |
| H <sub>2</sub> Pc [β-O(4-CF <sub>3</sub> -Ph) <sub>4</sub> ] (2)                                                                                                                                                                                                              | n                           | 0.03      | SA                 | 10.8                              | 0.5-0.9     | -    |
| CoPc[α-(4-CF <sub>3</sub> -Ph) <sub>4</sub> ] (3)                                                                                                                                                                                                                             | n                           | 0.198     | SA                 | 19.9                              | 0.2-1       | -    |
| H <sub>2</sub> Pc[α-(4-CF <sub>3</sub> -Ph) <sub>4</sub> ] (4)                                                                                                                                                                                                                | n                           | 0.25      | SA                 | 4.4                               | 0.5-1.25    | -    |
| (Pc)Eu{Pc[(OC <sub>2</sub> H <sub>4</sub> ) <sub>3</sub> OCH <sub>3</sub> ] <sub>8</sub> }Eu{Pc[(OC <sub>2</sub> H <sub>4</sub> ) <sub>3</sub> OCH <sub>3</sub> ] <sub>8</sub> }                                                                                              | n                           | 0.05      | QLS <sup>[b]</sup> | 60                                | 0.05-0.5    | 2    |
| EuPc [Pc(OH) <sub>8</sub> ]                                                                                                                                                                                                                                                   | n                           | 0.05      | QLS                | -                                 | 0.05-0.25   | 3    |
| Eu[Pc(OH) <sub>8</sub> ] <sub>2</sub>                                                                                                                                                                                                                                         | n                           | 0.5       | QLS                | -                                 | 0.5-1.5     | 3    |
| Eu <sub>2</sub> (Pc) <sub>2</sub> (TPyP)                                                                                                                                                                                                                                      | n                           | 0.4       | QLS                | 32                                | 0.4-0.9     | 4    |
| H <sub>2</sub> Pc(OCH <sub>2</sub> CF <sub>3</sub> ) <sub>4</sub>                                                                                                                                                                                                             | n                           | 0.1       | QLS                | 7.5                               | 0.1-0.5     | 5    |
| Eu <sub>2</sub> [Pc(OCH <sub>2</sub> CF <sub>3</sub> ) <sub>4</sub> ] <sub>3</sub> ( × phase)                                                                                                                                                                                 | n                           | 0.02      | QLS                | 412                               | 0.02-0.06   | 6    |
| H <sub>2</sub> [Pc(OCH <sub>2</sub> C <sub>3</sub> F <sub>7</sub> ) <sub>8</sub> ]                                                                                                                                                                                            | n                           | 0.05      | DC                 | 30.4                              | 0.05-0.9    | 7    |
| Zn[Pc(OCH <sub>2</sub> C <sub>3</sub> F <sub>7</sub> ) <sub>8</sub> ]                                                                                                                                                                                                         | n                           | 0.1       | DC                 | 24.4                              | 0.1-0.75    | 7    |
| H <sub>2</sub> [Pc(OCH <sub>2</sub> (CF <sub>2</sub> ) <sub>6</sub> CF <sub>3</sub> ) <sub>4</sub> ]                                                                                                                                                                          | n                           | 0.1       | DC                 | 7.54                              | 0.1-1       | 8    |
| H <sub>2</sub> [Pc(OCH <sub>2</sub> (CF <sub>2</sub> ) <sub>6</sub> CF <sub>3</sub> ) <sub>4</sub> ]                                                                                                                                                                          | n                           | 0.1       | VD <sup>[c]</sup>  | 12.1                              | 0.1-1       | 8    |
| [{Pc(OC <sub>4</sub> H <sub>9</sub> ) <sub>8</sub> } <sub>8</sub> Y{BiPc(OC <sub>4</sub> H <sub>9</sub> ) <sub>12</sub> } <sub>8</sub> Y{Pc(OC <sub>4</sub> H <sub>9</sub> ) <sub>8</sub> } <sub>8</sub> ]                                                                    | n                           | 0.5       | QLS                | -                                 | 0.5-3       | 9    |
| H <sub>2</sub> {Pc(15C5) <sub>3</sub> [(OC <sub>8</sub> H <sub>17</sub> ) <sub>2</sub> ]} <sub>8</sub> /CdS                                                                                                                                                                   | n                           | 0.05      | QLS                | 20                                | 0.5-2.5     | 10   |
| H <sub>2</sub> {Pc(15C5) <sub>3</sub> [(OC <sub>8</sub> H <sub>17</sub> ) <sub>6</sub> ]} <sub>8</sub> /CdS                                                                                                                                                                   | n                           | 0.05      | QLS                | 19.6                              | 0.5-2.5     | 10   |
| H <sub>2</sub> [Pc(OC <sub>8</sub> H <sub>17</sub> ) <sub>8</sub> ]/CdS                                                                                                                                                                                                       | n                           | 0.05      | QLS                | 5.6                               | 0.5-2.5     | 10   |
| (TPyP)Eu <sub>2</sub> [Pc(OC <sub>4</sub> H <sub>9</sub> ) <sub>8</sub> ] <sub>2</sub>                                                                                                                                                                                        | n                           | 0.4       | QLS                | -                                 | 0.4-0.9     | 11   |
| Eu <sub>2</sub> [PcS(C <sub>6</sub> H <sub>13</sub> ) <sub>8</sub> ] <sub>3</sub>                                                                                                                                                                                             | n                           | 0.1       | QLS                | 23.4                              | 0.1-0.5     | 12   |
| [Pc(SC <sub>6</sub> H <sub>13</sub> ) <sub>8</sub> ] <sub>2</sub> Eu <sub>2</sub> [BiPc(SC <sub>6</sub> H <sub>13</sub> ) <sub>12</sub> ] <sub>2</sub> Eu <sub>2</sub> [Pc(SC <sub>6</sub> H <sub>13</sub> ) <sub>8</sub> ] <sub>2</sub>                                      | n                           | 0.1       | QLS                | 46.7                              | 0.1-0.5     | 12   |
| [Pc(SC <sub>6</sub> H <sub>13</sub> ) <sub>8</sub> ] <sub>8</sub> Eu[Pc(SC <sub>6</sub> H <sub>13</sub> ) <sub>8</sub> ] <sub>8</sub> Cd[Pc(SC <sub>6</sub> H <sub>13</sub> ) <sub>8</sub> ] <sub>8</sub> Eu[Pc(SC <sub>6</sub> H <sub>13</sub> ) <sub>8</sub> ] <sub>8</sub> | n                           | 0.25      | QLS                | 11.6                              | 1.25-2.5    | 13   |
| Gd <sub>2</sub> [Pc(OPhF) <sub>8</sub> ] <sub>3</sub>                                                                                                                                                                                                                         | n                           | 0.05      | QLS                | 6.4                               | 0.05-0.25   | 14   |
| Tb <sub>2</sub> [Pc(OPhF) <sub>8</sub> ] <sub>3</sub>                                                                                                                                                                                                                         | n                           | 0.05      | QLS                | 11                                | 0.05-0.25   | 14   |

<sup>a</sup> SA: Self-assembly; <sup>b</sup> QLS: quasi-Langmuir-Shäfer; <sup>c</sup> VD: vacuum deposited

**Table S3.** NH<sub>3</sub> detection properties for films of some representative phthalocyanine-based compounds at the room temperature.

| Compounds                                                                                                                                                                        | p/n-type (NH <sub>3</sub> ) | LOD (ppm) | Method | Sensitivity (%ppm <sup>-1</sup> ) | Range (ppm) | Ref. |
|----------------------------------------------------------------------------------------------------------------------------------------------------------------------------------|-----------------------------|-----------|--------|-----------------------------------|-------------|------|
| CoPc[β-O(4-CF <sub>3</sub> -Ph) <sub>4</sub> ] (1)                                                                                                                               | n                           | 0.42      | SA     | 0.17                              | 4-24        | -    |
| H <sub>2</sub> Pc [β-O(4-CF <sub>3</sub> -Ph) <sub>4</sub> ] (2)                                                                                                                 | p                           | 4         | SA     | 0.015                             | 4-24        | -    |
| CoPc[α-(4-CF <sub>3</sub> -Ph) <sub>4</sub> ] (3)                                                                                                                                | n                           | 2.4       | SA     | 0.052                             | 4-28        | -    |
| H <sub>2</sub> Pc[α-(4-CF <sub>3</sub> -Ph) <sub>4</sub> ] (4)                                                                                                                   | p                           | 5.1       | SA     | 0.11                              | 6-30        | -    |
| (Pc)Eu{Pc[(OC <sub>2</sub> H <sub>4</sub> ) <sub>3</sub> OCH <sub>3</sub> ] <sub>8</sub> }Eu{Pc[(OC <sub>2</sub> H <sub>4</sub> ) <sub>3</sub> OCH <sub>3</sub> ] <sub>8</sub> } | p                           | 5         | QLS    | 0.17                              | 5-25        | 2    |
| EuPc[Pc(OH) <sub>8</sub> ]                                                                                                                                                       | p                           | 2.5       | QLS    | -                                 | 2.5-12.5    | 3    |
| Eu <sub>2</sub> (Pc) <sub>2</sub> (TPyP)                                                                                                                                         | p                           | 5         | QLS    | 0.04                              | 5-30        | 4    |
| Ho(Pc)[Pc(OPh) <sub>8</sub> ]                                                                                                                                                    | p                           | 15        | QLS    | 0.0018                            | 200-800     | 15   |
| Ho[Pc(OPh) <sub>8</sub> ] <sub>2</sub>                                                                                                                                           | n                           | 15        | QLS    | 0.0089                            | 200-800     | 15   |
| Eu <sub>2</sub> (Pc) <sub>2</sub> [T(OH)PP]                                                                                                                                      | P                           | 15        | QLS    | 0.0046                            | 200-800     | 16   |
| Eu <sub>2</sub> (Pc) <sub>2</sub> [cis-T(OH) <sub>2</sub> PP]                                                                                                                    | p                           | 15        | QLS    | 0.0082                            | 200-800     | 16   |
| Eu <sub>2</sub> (Pc) <sub>2</sub> [trans-T(OH) <sub>2</sub> PP]                                                                                                                  | p                           | 15        | QLS    | 0.0026                            | 200-800     | 16   |
| CoPc                                                                                                                                                                             | p                           | 25        | VD     | 0.15                              | 25-300      | 17   |
| s-CoPc                                                                                                                                                                           | p                           | 25        | VD     | 0.071                             | 25-300      | 17   |
| [{Pc(OC <sub>4</sub> H <sub>9</sub> ) <sub>8</sub> }Y{BiPc(OC <sub>4</sub> H <sub>9</sub> ) <sub>12</sub> }Y{Pc(OC <sub>4</sub> H <sub>9</sub> ) <sub>8</sub> }]                 | p                           | 7.5       | QLS    | -                                 | 7.5-200     | 9    |
| (TPyP)Eu <sub>2</sub> [Pc(OC <sub>4</sub> H <sub>9</sub> ) <sub>8</sub> ] <sub>2</sub>                                                                                           | p                           | 1         | QLS    | -                                 | 1-20        | 11   |
| Gd <sub>2</sub> [Pc(OPhF) <sub>8</sub> ] <sub>3</sub>                                                                                                                            | p                           | 5         | QLS    | 0.043                             | 5-20        | 14   |
| Tb <sub>2</sub> [Pc(OPhF) <sub>8</sub> ] <sub>3</sub>                                                                                                                            | p                           | 0.15      | QLS    | 0.14                              | 1-5         | 14   |

<sup>a</sup> SA: Self-assembly; <sup>b</sup> QLS: quasi-Langmuir-Shäfer; <sup>c</sup> VD: vacuum deposited

**Table S4.** H<sub>2</sub>S detection properties for films of some representative phthalocyanine-based compounds at the room temperature.

| Compounds                                      |     | p/n-type (H <sub>2</sub> S) | LOD (ppm) | Method | Sensitivity (%ppm <sup>-1</sup> ) | Range (ppm) | Ref. |
|------------------------------------------------|-----|-----------------------------|-----------|--------|-----------------------------------|-------------|------|
| CoPc[β-O(4-CF <sub>3</sub> -Ph) <sub>4</sub> ] | (1) | n                           | 0.1       | SA     | 1.04                              | 0.4-2.4     | -    |
| cPcCo-HQ-aCNT                                  |     | p                           | 0.005     | SA     | -                                 | 0.02-5.12   | 18   |
| Au-CoPc                                        |     | p-n                         | 0.1       | VD     | -                                 | 0.1-50      | 19   |
| CuPc-OTFT                                      |     | p-n                         | 100       | VD     | -                                 | 100-500     | 20   |
| ZnO-CoPc                                       |     | p-n                         | 10        | VD     | -                                 | 10-50       | 21   |
| ZnPc-FET                                       |     | n                           | 0.05      | VD     | -                                 | 0.02-20     | 22   |

<sup>a</sup> SA: Self-assembly; <sup>b</sup> QLS: quasi-Langmuir-Shäfer; <sup>c</sup> VD: vacuum deposited

## Reference

- 1 S. Wei, D. Huang, L. Li and Q. Meng, *Dyes and Pigments*, 2003, **56**, 1-6.
- 2 H. Wang, X. Kong, S. Zhao, J. Wu, X. Li and Y. Chen, *New Journal of Chemistry*, 2017, **41**, 11955-11961.
- 3 X. Kong, Z. Dong, Y. Wu, X. Li, Y. Chen and J. Jiang, *Chinese Journal of Chemistry*, 2016, **34**, 975-982.
- 4 K. Abdullah, Y. Wu, S. Zhao, X. Kong, X. Li and Y. Chen, *Inorganic Chemistry Communications*, 2017, **86**, 1-5.
- 5 Z. Dong, X. Kong, Y. Wu, J. Zhang and Y. Chen, *Inorganic Chemistry Communications*, 2017, **77**, 18-22.
- 6 Z. Dong, X. Kong, D. Qi, S. Zhao, X. Li, Y. Chen and J. Jiang, *Organic Electronics*, 2018, **53**, 127-134.
- 7 X. Wang, H. Wang, X. Ding, X. Wang, X. Li and Y. Chen, *Organic Electronics*, 2017, **50**, 389-396.
- 8 Q. Sun, W. Feng, P. Yang, G. You and Y. Chen, *New Journal of Chemistry*, 2018, **42**, 6711-4718.
- 9 G. Lu, K. Wang, X. Kong, H. Pan, J. Zhang, Y. Chen and J. Jiang, *ChemElectroChem*, 2018, **5**, 605-609.
- 10 C. Yang, R. He, Q. Sun, Y. Chen and J. Jiang, *Journal of Porphyrins and Phthalocyanines*, 2019, **23**, 507-517.
- 11 K. Abdullah, Y. Chen and J. Jiang, *Journal of Porphyrins and Phthalocyanines*, 2017, **21**, 893-899.
- 12 G. Lu, X. Kong, C. Wang, L. Zhao, D. Qi, Y. Jiang, S. Zhao, Y. Chen and J. Jiang, *Dyes and Pigments*, 2019, **161**, 240-246.
- 13 G. Lu, X. Kong, H. Wang, Y. Chen, C. Wei, Y. Chen and J. Jiang, *New Journal of Chemistry*, 2019, **43**, 15763-15767.
- 14 S. Zhao, X. Kong, X. Wang, X. Li, G. Yang and Y. Chen, *IEEE Transactions on Electron Devices*, 2019, **66**, 1930-1936.
- 15 Y. Chen, D. Li, N. Yuan, J. Gao, R. Gu, G. Lu and M. Bouvet, *Journal of Materials Chemistry*, 2012, **22**, 22142-22149.
- 16 J. Gao, G. Lu, Y. Chen and M. Bouvet, *Sensors and Actuators B: Chemical*, 2012, **166**, 500-507.
- 17 T. Sizun, M. Bouvet, Y. Chen, J. M. Suisse, G. Barochi and J. Rossignol, *Sensors and Actuators B: Chemical*, 2011, **159**, 163-170.
- 18 H. Wu, Z. Chen, J. Zhang, F. Wu, C. He, B. Wang, Y. Wu and Z. Ren, *Journal of Materials Chemistry A*, 2016, **4**, 1096-1104.
- 19 A. Kumar, N. Joshi, S. Samanta, A. Singh, A. K. Debnath, A. K. Chauhan, M. Roy, R. Prasad, K. Roy, M. M. Chehimi, D. K. Aswal and S. K. Gupta, *Sensors and Actuators B: Chemical*, 2015, **206**, 653-662.
- 20 X. Li, Y. Jiang, G. Xie, H. Tai, P. Sun and B. Zhang, *Sensors and Actuators B: Chemical*, 2013, **176**, 1191-1196.
- 21 A. Kumar, S. Samanta, A. Singh, M. Roy, S. Singh, S. Basu, M. M. Chehimi, K. Roy, N. Ramgir, M. Navaneethan, Y. Hayakawa, A. K. Debnath, D. K. Aswal and S. k. Gupta, *ACS applied materials & interfaces*, 2015, **7**, 17713-17724.
- 22 Z. Song, Q. Tang, Y. Tong and Y. Liu, *IEEE Electron Device Letters*, 2017, **38**, 1586-1589.
